# Supplementary material
Source: PubMed Central journal article supplement (PMC3545767)
Supplement: 1211130110_pnas.201211130SI.pdf [file 1211130110_pnas.201211130SI.pdf]

# Supporting Information

Vallat et al. 10.1073/pnas.1211130110

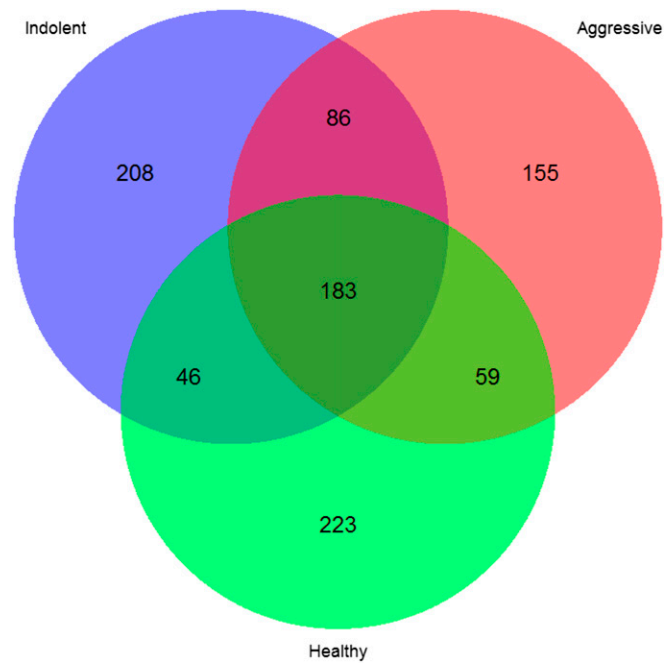

**Fig. S1.** Venn diagram: distribution of the 960 probe sets between the three cell groups. A total of 960 probe sets was retained for all of the subjects across the three different cell groups. A core of 183 probe sets is shared by the three groups.

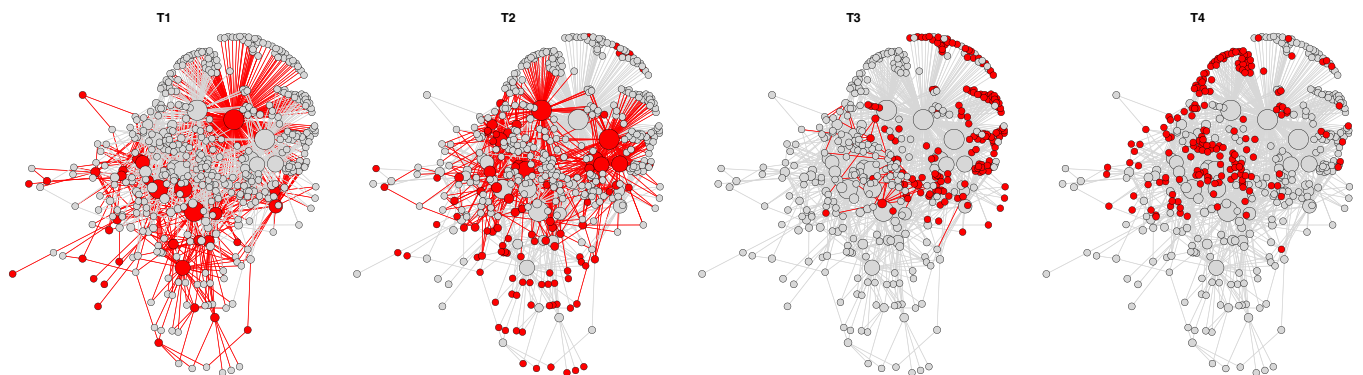

**Fig. S2.** Each graphic represents genes in a specific categorical time label (1–4, from left to right) and their connections, showing how the signal is spreading through the aggressive network.





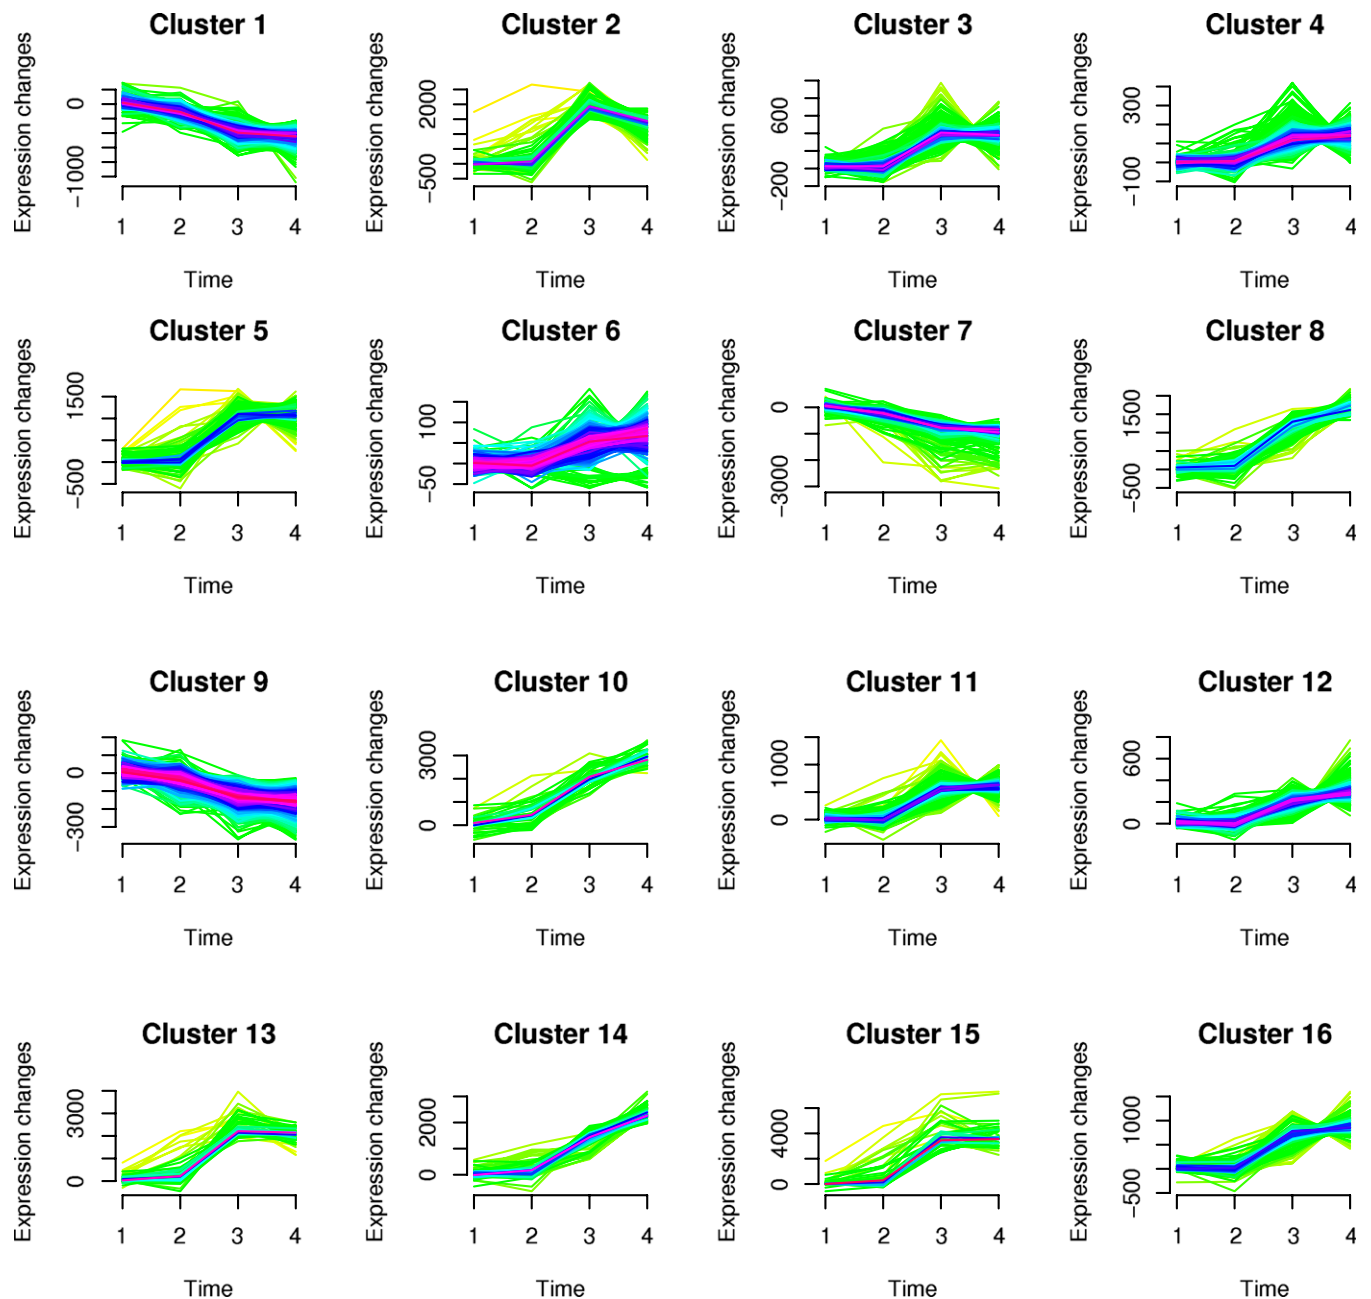

**Fig. S6.** Significance of selected patterns in the clustering step. To evaluate the relevance of our selected patterns used for enrichment, we compared these patterns with various temporal gene clusters obtained with a gold standard unsupervised clustering method. One of the most widely used clustering methods is fuzzy *c*-means (1). The preponderant aspect of this algorithm relies on the fuzzy parameter that allows taking into account the inherent noise of transcriptional data (when this parameter increases, more genes are randomly assigned into clusters). For comparison purposes, we focused on the biological data set of patients with more-aggressive CLL, and we first select relevant genes with Limma (2), using a *P* value of 0.01. An unsupervised temporal clustering of the 8,113 genes retained with Limma (2) is then performed showing 16 distinct clusters. Importantly, these clusters emphasize the existence of genes with transient expressions (peaks) at  $t_1$  (cluster 1, 7, 9),  $t_2$  (within cluster 2, 4),  $t_3$  (cluster 2, 3, 4, 11, 13, 15), and  $t_4$  (cluster 5, 6, 8, 10, 12, 14, 16), as shown by our method. The fact that through this unsupervised clustering method we reach patterns similar to those produced by our method confirms the pertinence of our own gene selection process.

1. Cannon RL, Dave JV, Bezdek JC (1986) Efficient implementation of the fuzzy *c*-means clustering algorithms. *IEEE Trans Pattern Anal Mach Intell* 8(2):248–255.
2. Smyth GK, Michaud J, Scott HS (2005) Use of within-array replicate spots for assessing differential expression in microarray experiments. *Bioinformatics* 21(9):2067–2075.
